# Supplementary material for: Modified Atmospheric CO2 Levels for Maintenance of Fruit Weight and Nutritional Quality upon Long-Term Storage in Blueberry (Vaccinium corymbosum L.) ‘Liberty’
Source: MDPI journal article supplement (doi:10.3390/horticulturae7110478), 2021-11-09
Supplement: s1 [file s1]

**Supplementary Table S1.** Weight and total sugars and organic acids of blueberry fruit for the air control and the controlled atmospheres of 5 % CO<sub>2</sub>, 5 % O<sub>2</sub>, 90 % N<sub>2</sub> (5 % CO<sub>2</sub>), 15 % CO<sub>2</sub>, 5 % O<sub>2</sub>, 80 % N<sub>2</sub> (15 % CO<sub>2</sub>), and 25 % CO<sub>2</sub>, 5 % O<sub>2</sub>, 70 % N<sub>2</sub> (25 % CO<sub>2</sub>), according to length of storage.

| Condition            | Storage time (days) | Weight (g)        | Total sugars (mg/g FW) | Total organic acids (mg/g FW) | Total sugars: organic acids ratio |
|----------------------|---------------------|-------------------|------------------------|-------------------------------|-----------------------------------|
| Air control          | 0                   | 100.0 ±0.0 a      | 95.32 ±5.52 a          | 10.25 ± 0.12 a                | 9.29 ± 0.45 a                     |
|                      | 17                  | 93.82 ±0.34 b, C  | 63.27 ±7.10 b, C       | 7.99 ± 0.35 c, C              | 7.97 ± 0.78 b, BC                 |
|                      | 30                  | 93.04 ±0.17 c, AB | 61.50 ±10.22 b, C      | 7.57 ± 0.40 c, C              | 8.16 ± 1.15 ab, B                 |
|                      | 44                  | 92.84 ±0.46 cd, A | 67.02 ±8.49 b, B       | 8.65 ± 0.59 b, A              | 7.79 ± 0.90 b, C                  |
|                      | 62                  | 92.32 ±0.51 d, A  | 65.96 ±8.78 b, C       | 9.13 ± 0.43 b                 | 7.32 ± 0.99 b, C                  |
| Significance         |                     | ***               | ***                    | ***                           | *                                 |
| 5 % CO <sub>2</sub>  | 0                   | 100.0 ±0.0 a      | 99.49 ±3.26 a          | 10.14 ± 0.17 a                | 9.81 ± 0.34 a                     |
|                      | 17                  | 95.24 ±0.60 b, B  | 73.61 ±5.10 b, B       | 10.05 ± 0.48 a, A             | 7.42 ± 0.83 b, C                  |
|                      | 30                  | 93.22 ±0.65 c, AB | 73.44 ±4.68 b, B       | 8.23 ± 0.15 c, B              | 9.03 ± 1.20 a, AB                 |
|                      | 44                  | 93.03 ±0.11 c, A  | 70.16 ±2.18 b, B       | 9.19 ± 0.45 b, A              | 7.64 ± 0.30 b, C                  |
|                      | 62                  | 93.02 ±0.32 c, A  | 66.97 ±5.34 b, C       | 8.84 ± 0.36 b                 | 7.59 ± 0.28 b, BC                 |
| Significance         |                     | ***               | ***                    | ***                           | ***                               |
| 15 % CO <sub>2</sub> | 0                   | 100.0 ±0.0 a      | 96.51 ±2.65 a          | 10.42 ± 0.17 a                | 9.27 ± 0.39 ab                    |
|                      | 17                  | 93.54 ±0.44 b, C  | 78.10 ±5.85 bc, B      | 8.90 ± 0.57 b, B              | 8.78 ± 0.33 ab, B                 |
|                      | 30                  | 92.50 ±0.70 c, B  | 70.07 ±6.93 c, BC      | 8.56 ± 0.26 b, B              | 8.19 ± 0.15 b, B                  |
|                      | 44                  | 90.20 ±0.29 d, B  | 84.14 ±10.10 b, A      | 8.77 ± 0.71 b, A              | 9.75 ± 1.06 a, B                  |
|                      | 62                  | 90.15 ±0.43 d, B  | 77.14 ±3.41 bc, B      | 9.10 ± 0.79 b                 | 8.63 ± 1.36 b, AB                 |
| Significance         |                     | ***               | ***                    | ***                           | *                                 |
| 25 % CO <sub>2</sub> | 0                   | 100.0 ±0.0 a      | 100.34 ±0.91 a         | 10.39 ± 0.07 a                | 9.66 ± 0.11 b                     |
|                      | 17                  | 96.49 ±0.33 b, A  | 86.71 ±5.11 b, A       | 8.83 ± 0.60 c, B              | 9.83 ± 0.29 b, A                  |
|                      | 30                  | 93.71 ±0.37 c, A  | 94.80 ±4.74 ab, A      | 9.56 ± 0.63 b, A              | 9.94 ± 0.60 b, A                  |
|                      | 44                  | 92.86 ±0.25 d, A  | 87.76 ±7.30 b, A       | 7.77 ± 0.44 d, B              | 11.32 ± 0.49 a, A                 |
|                      | 62                  | 92.69 ±0.51 d, A  | 90.93 ±2.03 ab, A      | 9.31 ± 0.36 bc                | 9.77 ± 0.52 b, A                  |
| Significance         |                     | ***               | **                     | ***                           | ***                               |
| Significance         | 17                  | ***               | ***                    | ***                           | ***                               |
|                      | 30                  | *                 | ***                    | ***                           | *                                 |
|                      | 44                  | ***               | **                     | **                            | ***                               |
|                      | 62                  | ***               | ***                    | NS                            | **                                |

Data are means ±standard errors (five replicates per condition)

Different lowercase letters (a-d) indicate statistically significant differences between storage durations within each CO<sub>2</sub> condition; different uppercase letters (A-C) indicate statistically significant differences between CO<sub>2</sub> conditions within each storage duration (Duncan tests,  $\alpha$  <0.05)

\*, p <0.05; \*\*, p <0.01; \*\*\*, p <0.001

**Supplementary Table S2.** Hydroxycinnamic acids, flavan-3-ols, flavonols, anthocyanins and total phenolics of blueberry fruit for the air control and the controlled atmospheres of 5 % CO<sub>2</sub>, 5 % O<sub>2</sub>, 90 % N<sub>2</sub> (5 % CO<sub>2</sub>), 15 % CO<sub>2</sub>, 5 % O<sub>2</sub>, 80 % N<sub>2</sub> (15 % CO<sub>2</sub>), and 25 % CO<sub>2</sub>, 5 % O<sub>2</sub>, 70 % N<sub>2</sub> (25 % CO<sub>2</sub>), according to length of storage.

| Condition            | Storage time<br>(days) | Phenolics content (mg/kg FW) |                    |                    |                   |                    |
|----------------------|------------------------|------------------------------|--------------------|--------------------|-------------------|--------------------|
|                      |                        | Hydroxycinnamic acids        | Flavan-3-ols       | Flavonols          | Anthocyanins      | Total              |
| Air control          | 0                      | 354.3 ± 6.94 e               | 322.8 ± 12.42 a    | 252.0 ± 10.67 ab   | 5853 ± 103.0 ab   | 6782 ± 113.8 ab    |
|                      | 17                     | 406.1 ± 12.82 d, A           | 268.2 ± 15.17 b, A | 240.5 ± 7.92 bc, A | 5108 ± 172.0 c, A | 6023 ± 173.5 c, A  |
|                      | 30                     | 453.0 ± 12.82 b, A           | 310.7 ± 33.70 a, A | 254.3 ± 12.87 a, A | 5869 ± 145.8 a, A | 6887 ± 162.4 a, A  |
|                      | 44                     | 478.2 ± 5.66 a, A            | 257.4 ± 17.11 b, A | 262.3 ± 8.80 a, A  | 5650 ± 215.2 b, A | 6648 ± 237.3 b, A  |
|                      | 62                     | 435.6 ± 9.74 c, A            | 228.4 ± 19.30 c, B | 235.4 ± 8.37 c, B  | 5062 ± 116.5 c, B | 5961 ± 134.9 c, B  |
| Significance         |                        | ***                          | ***                | **                 | ***               | ***                |
| 5 % CO <sub>2</sub>  | 0                      | 350.4 ± 6.88 d               | 351.9 ± 9.83 a     | 246.3 ± 8.86 b     | 5650 ± 63.05 bc   | 6598 ± 77.52 bc    |
|                      | 17                     | 353.8 ± 6.03 d, B            | 235.9 ± 11.32 c, B | 225.4 ± 10.74 c, B | 5039 ± 154.2 d, A | 5854 ± 175.4 d, A  |
|                      | 30                     | 366.9 ± 7.70 c, B            | 275.8 ± 13.71 b, B | 247.9 ± 10.97 b, A | 5952 ± 65.79 a, A | 6843 ± 70.03 a, A  |
|                      | 44                     | 425.1 ± 3.94 a, B            | 265.7 ± 12.18 b, A | 245.4 ± 7.14 b, B  | 5778 ± 55.60 b, A | 6714 ± 69.51 ab, A |
|                      | 62                     | 413.5 ± 9.50 b, B            | 262.4 ± 12.18 b, A | 266.3 ± 7.48 a, A  | 5535 ± 135.3 c, A | 6477 ± 154.2 c, A  |
| Significance         |                        | ***                          | ***                | ***                | ***               | ***                |
| 15 % CO <sub>2</sub> | 0                      | 360.7 ± 3.03 a               | 332.1 ± 14.45 a    | 260.0 ± 11.69 a    | 5716 ± 188.2 a    | 6669 ± 213.6 a     |
|                      | 17                     | 341.1 ± 9.02 b, C            | 228.5 ± 6.35 b, B  | 171.4 ± 11.01 c, C | 4412 ± 211.2 b, B | 5153 ± 218.5 b, B  |
|                      | 30                     | 297.2 ± 7.45 c, D            | 172.0 ± 6.69 c, D  | 162.0 ± 6.64 c, C  | 2644 ± 132.5 e, C | 3275 ± 129.2 e, C  |
|                      | 44                     | 368.9 ± 11.8 a, C            | 223.0 ± 10.05 b, B | 192.1 ± 7.89 b, C  | 3666 ± 140.6 d, B | 4450 ± 138.3 d, B  |
|                      | 62                     | 340.7 ± 6.65 b, C            | 214.5 ± 14.67 b, B | 199.5 ± 7.82 b, C  | 3960 ± 98.72 c, C | 4715 ± 116.4 c, C  |

|                      |    | ***                | ***                | ***                | ***               | ***               |
|----------------------|----|--------------------|--------------------|--------------------|-------------------|-------------------|
| Significance         |    | ***                | ***                | ***                | ***               | ***               |
| 25 % CO <sub>2</sub> | 0  | 369.0 ± 7.17 a     | 349.4 ± 12.84 a    | 255.3 ± 8.07 a     | 6049 ± 68.24 a    | 7023 ± 72.66 a    |
|                      | 17 | 347.5 ± 8.48 b, BC | 226.7 ± 28.11 b, B | 181.9 ± 6.67 b, C  | 4083 ± 137.4 b, C | 4839 ± 169.9 b, C |
|                      | 30 | 330.6 ± 6.84 c, C  | 232.6 ± 21.51 b, C | 180.4 ± 12.37 b, B | 3693 ± 120.9 c, B | 4437 ± 149.6 c, B |
|                      | 44 | 323.7 ± 7.90 c, D  | 225.3 ± 31.47 b, D | 178.1 ± 7.22 b, D  | 3461 ± 52.45 d, C | 4189 ± 81.39 d, C |
|                      | 62 | 275.4 ± 6.63 d, D  | 225.0 ± 9.65 b, B  | 169.7 ± 9.65 b, D  | 3474 ± 119.5 d, D | 4145 ± 127.6 d, D |
| Significance         |    | ***                | ***                | ***                | ***               | ***               |
| Significance         | 17 | ***                | **                 | ***                | ***               | ***               |
|                      | 30 | ***                | ***                | ***                | ***               | ***               |
|                      | 44 | ***                | **                 | ***                | ***               | ***               |
|                      | 62 | ***                | ***                | ***                | ***               | ***               |

Data are means ±standard errors (five replicates per condition)

Different lowercase letters (a-d) indicate statistically significant differences between storage durations within each CO<sub>2</sub> condition; different uppercase letters (A-C) indicate statistically significant differences between CO<sub>2</sub> conditions within each storage duration (Duncan tests,  $\alpha$  <0.05)

\*, p <0.05; \*\*, p <0.01; \*\*\*, p <0.001
